# Supplementary material
Source: publisher figshare collection journal article supplement (https://karger.figshare.com/ndownloader/files/27958821)

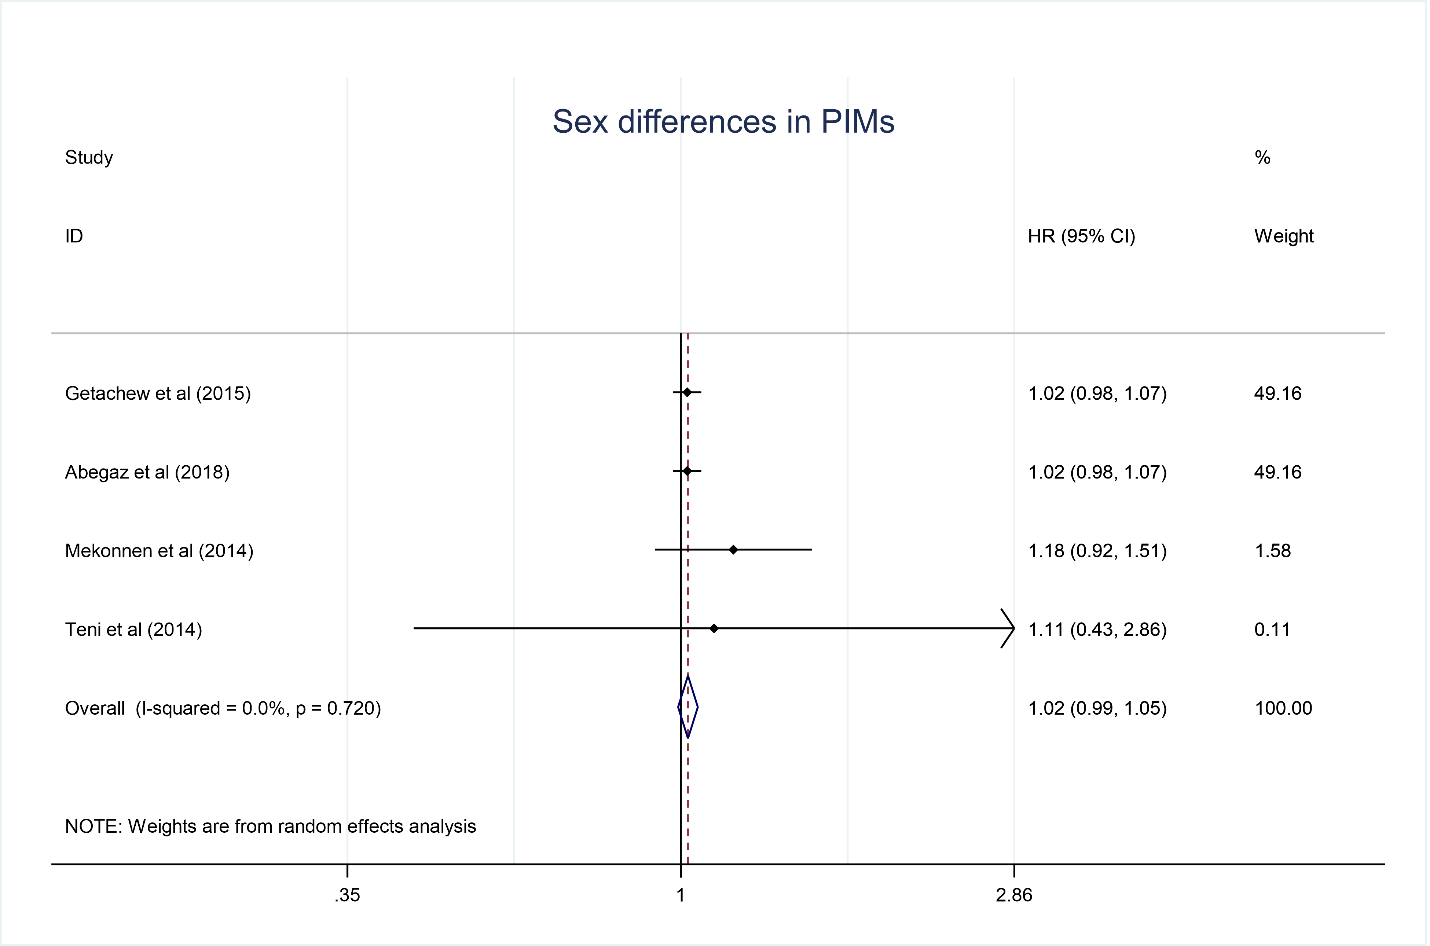


**Supplemental Figure 1:** Sex differences in PIMs in Ethiopia [32,36,37,38]

Supplement: Supplementary file 1 [file 27958821]
